# Supplementary material for: Toll-like receptor-4 differentially mediates intestinal and extra-intestinal immune responses upon multi-drug resistant Pseudomonas aeruginosa association of IL10−/− mice with chronic colitis
Source: Springer Nature journal article supplement (doi:10.1186/s13099-017-0211-z), 2017-11-07
Supplement: MOESM1 [file 15205388]

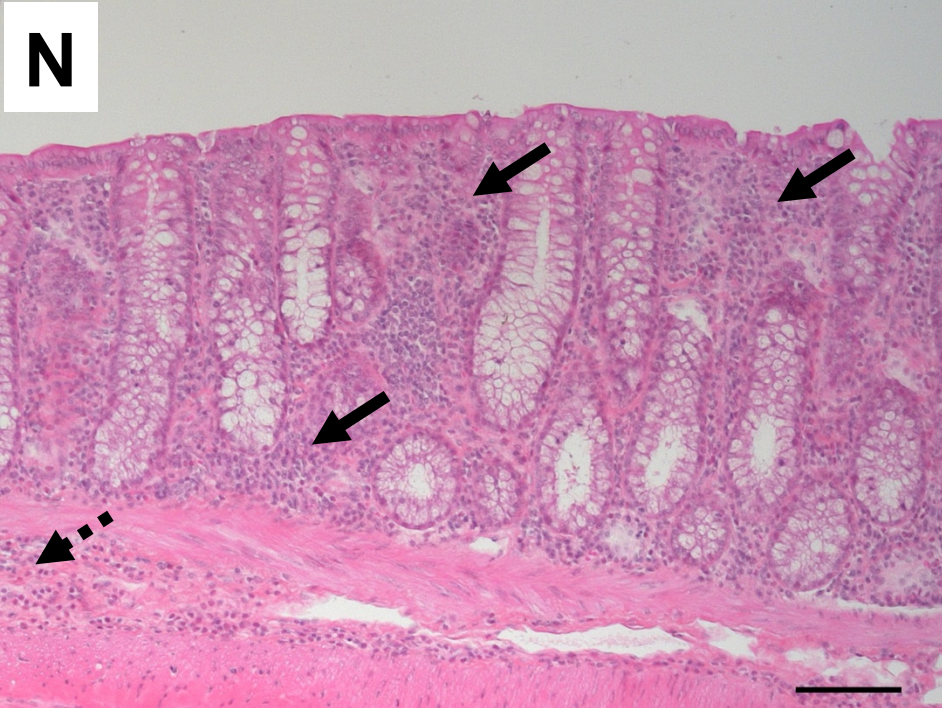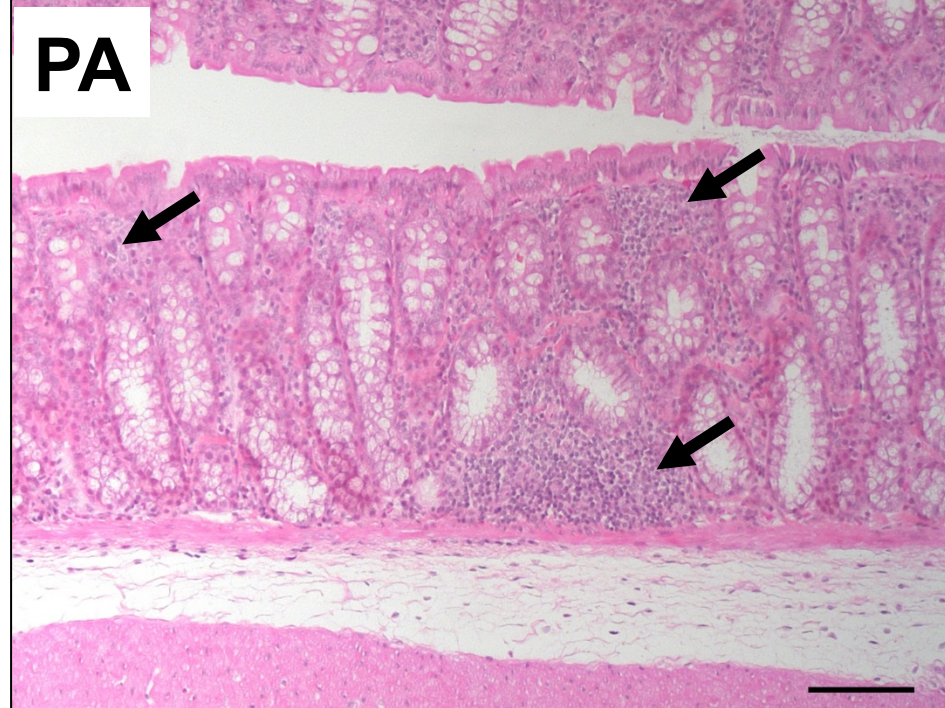

**IL10<sup>-/-</sup>**

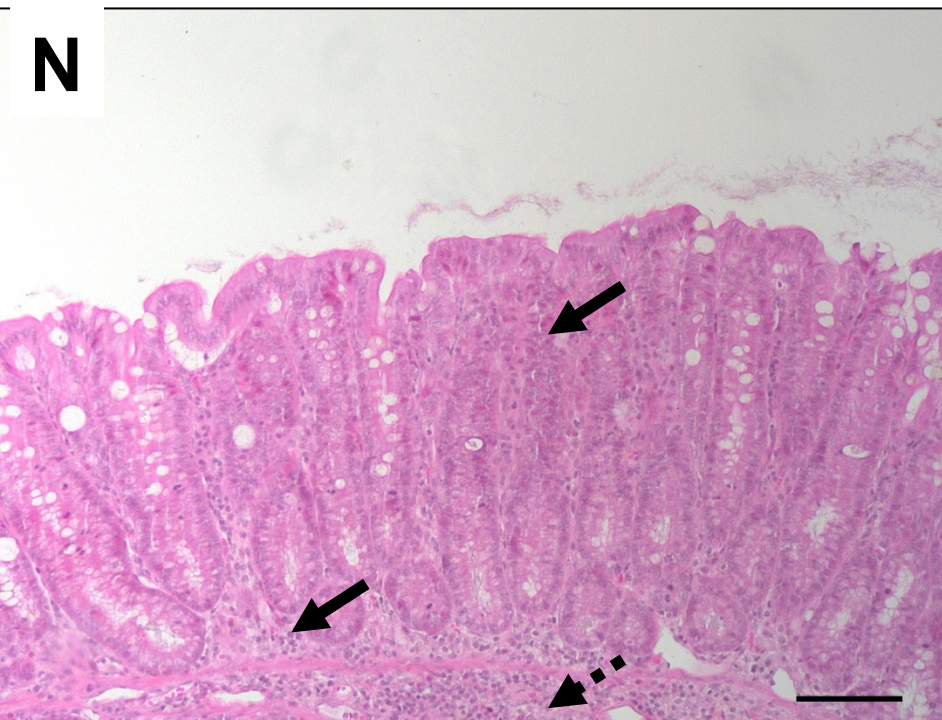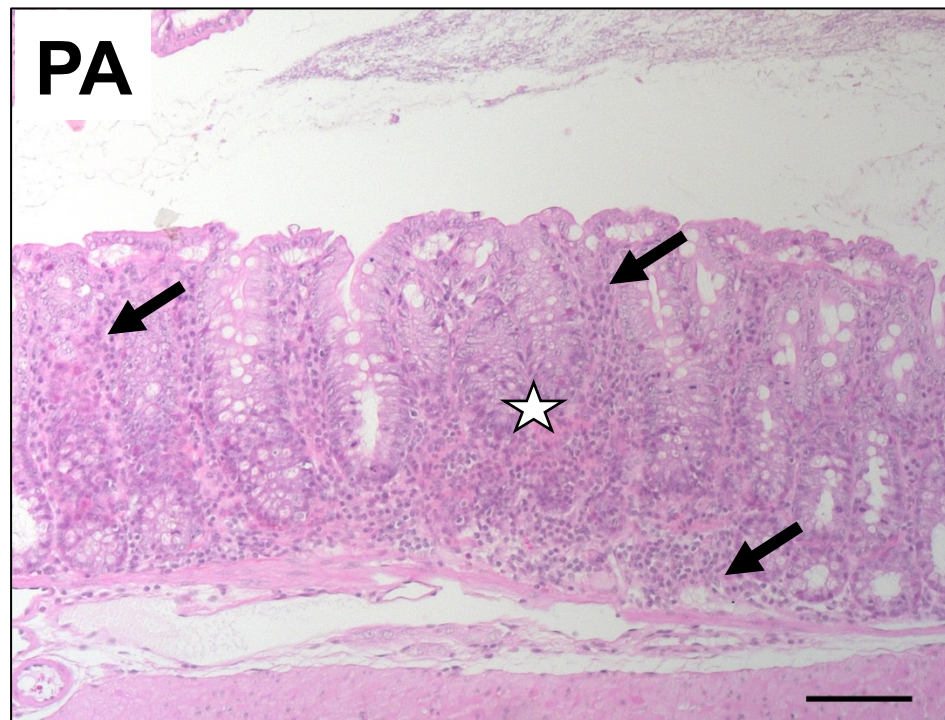

**TLR4<sup>-/-</sup> X IL10<sup>-/-</sup>**
